# Supplementary material for: Drug-Based Gold Nanoparticles Overgrowth for Enhanced SPR Biosensing of Doxycycline
Source: PubMed Central journal article supplement (PMC7699512; doi:10.3390/bios10110184), 2020-11-19
Supplement: biosensors-10-00184-s001.pdf [file biosensors-10-00184-s001.pdf]

Article

# Drug-Based Gold Nanoparticles Overgrowth for Enhanced SPR Biosensing of Doxycycline

Syed Akif Raza Kazmi <sup>1,2,\*</sup>, Muhammad Zahid Qureshi <sup>1</sup> and Jean-Francois Masson <sup>2,\*</sup>

<sup>1</sup> Department of Chemistry, Government College University Lahore, Lahore 54000, Pakistan; dr.zahidqureshi@gcu.edu.pk

<sup>2</sup> Département de chimie, Québec Centre for Advanced Materials and Regroupement Québécois sur les Matériaux de Pointe, C.P 6128 Succursale Centre-Ville Université de Montréal, Montreal, QC H3C 3J7, Canada

\* Correspondence: akifr1@gmail.com (S.A.R.K.); Jf.masson@umontreal.ca (J.-F.M.)

Received: 22 October 2020; Accepted: 18 November 2020; Published: 20 November 2020

## Supporting information content:

Figure S1. Histogram of the AuNP size (p. S-2)

Figure S2. Sensorgram of the AuNP interaction in absence of salt (p. S-4)

Figure S3. Sensorgram of the AuNP in presence of salt (p. S-5)

Further experimental details on chip formation (pp. S-2 to S-3)

## Histogram of doxy-AuNPs

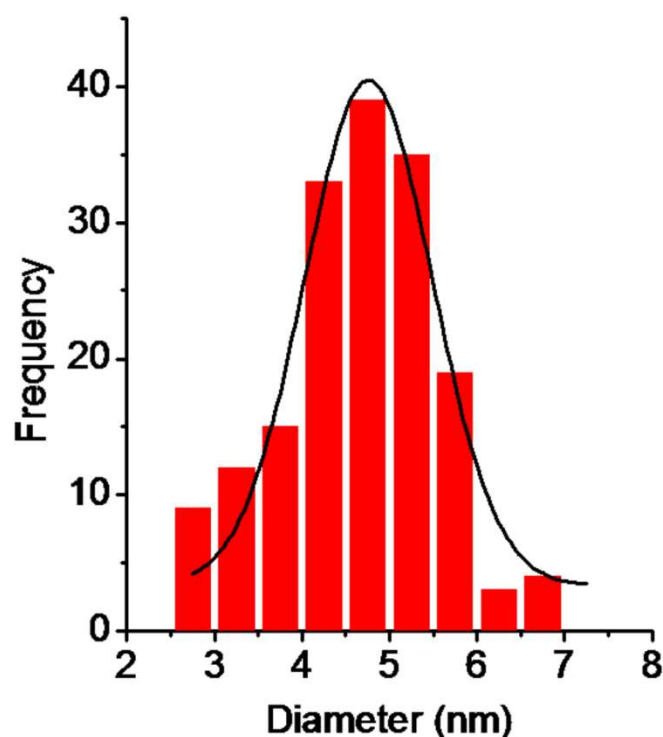

Figure S1. Histogram of doxy-AuNPs

## Fabrication of SPR sensor using 16-mercaptohexadecanoic acid (16-MHA) and 11-Mercapto-1-undecanol

The dove prism was coated with 1 nm Cr and 45 nm Au (ESPI metals) utilizing a Cressington 308R sputter coater. Afterwards, the gold coated dove prism was dipped into solution of 0.1 mM 16-mercaptohexadecanoic acid and 0.9 mM 11-mercapto-1-undecanol and left overnight for the formation of self assembled monolayer (SAM) of 16-mercaptohexadecanoic acid and 11-mercapto-1-undecanol. After that, the SAM modified gold coated prism was thoroughly rinsed 3 times with ethanol and purified water and dried under nitrogen.

Afterwards, the sensing surface was activated with 20 mM *N*-ethyl-*N'*-(3-dimethylaminopropyl)-carbodiimide (EDC, Fluka, purity > 97%) and 5 mM *N*-hydroxysuccinimide (NHS, Sigma Aldrich, purity > 98%) and left for 5 min. Then, the sensing

surface was rinsed with PBS, followed by the injection of the receptor solution of Protease Activated Receptor-1 (PAR-1) at  $5 \mu\text{g mL}^{-1}$  and reacted for 15 min.

The receptor PAR1 was covalently attached with the SAM through activated carboxylic acid group from EDC/NHS. Subsequently, non-specific binding sites on sensing surface were blocked by injecting 1 M ethanolamine hydrochloride (Sigma Aldrich,  $\geq 99.0\%$ ) for 10 min adjusted to pH 8.0 with 10 M sodium hydroxide (Fluka, purity  $> 98\%$ ) followed by rinsing with PBS to remove non-covalently attached receptor PAR1. This procedure was repeated for all SPR experiments.

### **Protease Activated Receptor (PAR-1)**

The protease activated receptor (PAR-1) protein was received from Cedarlane and stored at  $-80^\circ\text{C}$  until use. One the day of experiment, PAR-1 was dissolved in acetate buffer ( $20 \mu\text{g}/80 \mu\text{L}$ , m/v) adjusted at pH 8. Then,  $10 \mu\text{L}$  of the PAR1 solution was taken from this stock PAR1 solution. To this,  $490 \mu\text{L}$  acetate buffer (adjusted at pH 8) was added. This dilution of PAR-1 with final concentration  $5 \mu\text{g}/\text{mL}$  was used for each SPR biosensor experiment.

### **Role of NaCl in SPR sensing of doxycycline**

For SPR sensing of doxycycline, the role of sodium chloride was very important to maximize wavelength shift. It was interesting to note that doxy-AuNPs in absence of salt provided a very low wavelength shift (almost negligible) (Figure S2). We hypothesize this is due to a combination of the very small NP size (*i.e.* 4.7 nm diameter) and screening of charges in the low salt concentrations. Furthermore, a control test with NaCl solution in water (before injection of doxy-AuNPs) also led to a very small wavelength shift of 1 nm (Figure S3). However, doxy-AuNPs in the presence of NaCl provide a significantly larger wavelength shift (Figure S3). With 50 mM NaCl, doxy-AuNPs give the wavelength shift of 9.5 nm and with 100 mM NaCl, doxy-AuNPs give 25 nm wavelength shift (Figure S3). During the optimization for NaCl concentration, the highest wavelength shift was obtained at 100 mM

NaCl. This was the reason that doxy-AuNPs with 100 mM NaCl were used for all further SPR experiments for doxycycline determination.

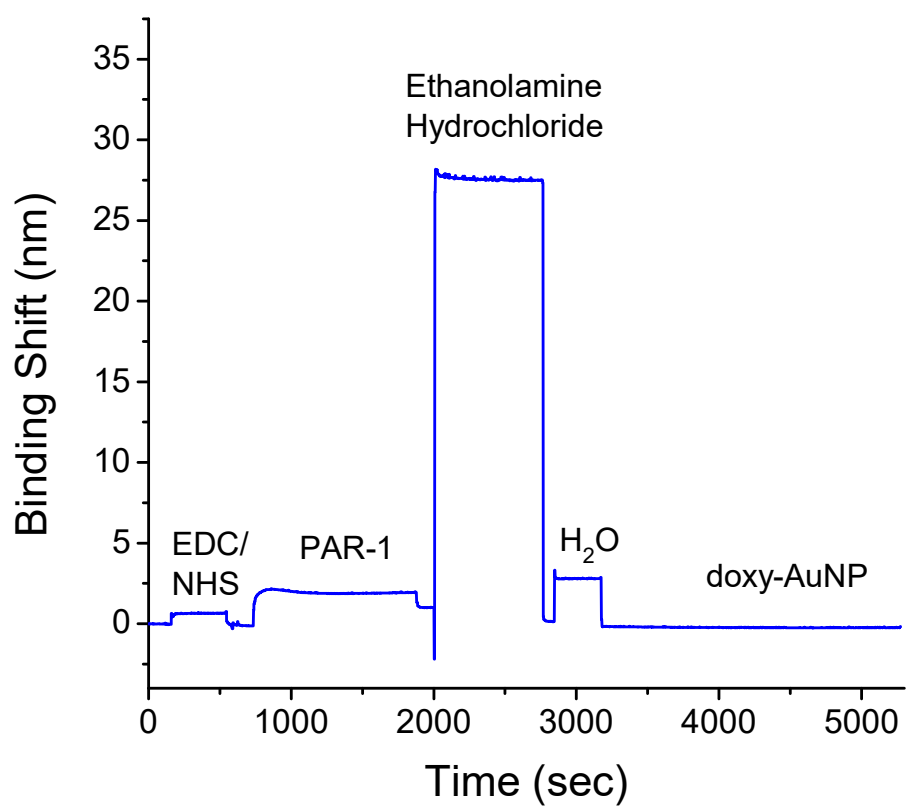

**Figure S2.** SPR sensorgram indicating the response of doxy-AuNP (without NaCl) towards the doxycycline determination

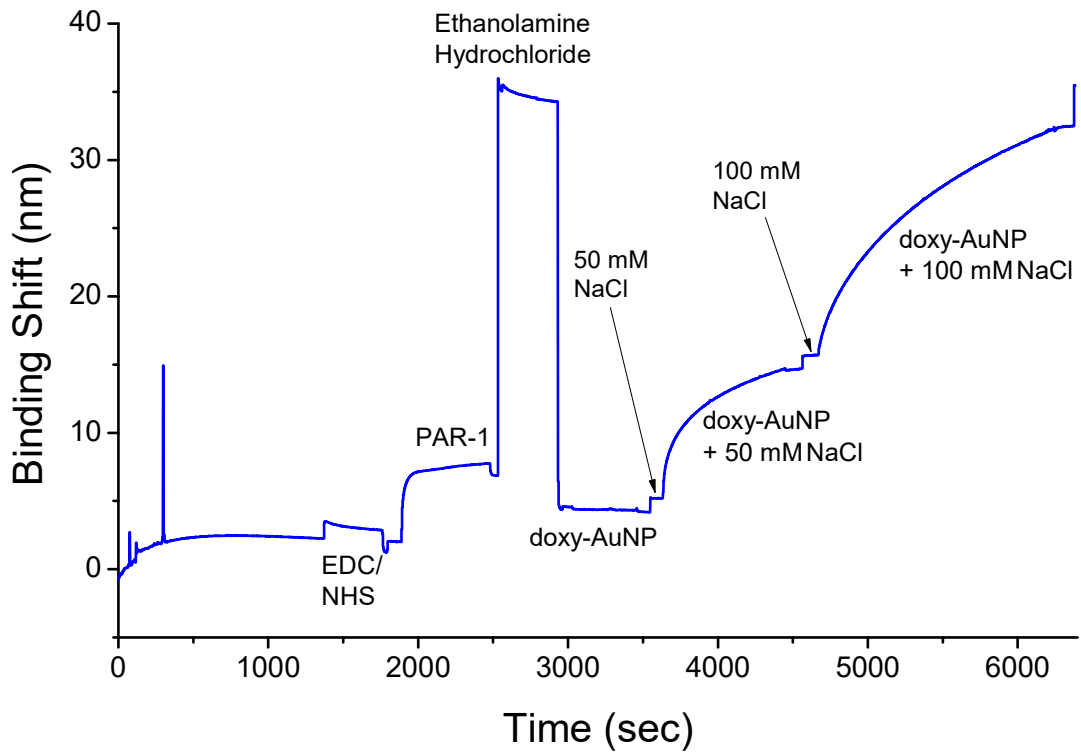

**Figure S3.** SPR sensorgram indicating the response of doxy-AuNP (with and without NaCl) towards the doxycycline determination
